# Supplementary material for: Unravelling the role of temperature in a redox supercapacitor composed of multifarious nanoporous carbon@hydroquinone
Source: Royal Society of Chemistry journal article supplement (doi:10.1039/c9ra09768f), 2020-01-01
Supplement: c9ra09768f1.pdf [file c9ra09768f1.pdf]

## **Electronic Supplementary Information**

### **Unravelling the Role of Temperature in a Redox Supercapacitor Composed of Multifarious Nanoporous Carbon@Hydroquinone**

Aditi Barua and Amit Paul

Department of Chemistry, Indian Institute of Science Education and Research

Bhopal

E-mail: apaul@iiserb.ac.in

| <b>Figure/Table</b> | <b>Content</b>                                                                                           | <b>Page No.</b> |
|---------------------|----------------------------------------------------------------------------------------------------------|-----------------|
| Figure S1           | PXRD patterns of <i>MNC</i> and <i>MNC-H<sub>2</sub>Q</i>                                                | S2              |
| Figure S2           | BET analysis of <i>MNC</i>                                                                               | S2              |
| Figures S3 and S4   | TGA and DSC curve of <i>MNC-H<sub>2</sub>Q</i>                                                           | S3              |
| Figure S5           | Cyclic Voltammetry plots of <i>MNC</i> , <i>H<sub>2</sub>Q</i> and <i>MNC-H<sub>2</sub>Q</i>             | S4              |
| Figure S6           | CVs overlays of <i>MNC-H<sub>2</sub>Q</i> during Cyclic test at 20 and 50 °C                             | S4              |
| Table S1            | Specific Capacitance values of <i>MNC</i>                                                                | S5              |
| Figure S7           | Cyclic Voltammetry plots of <i>MNC-H<sub>2</sub>Q</i> at different temperatures                          | S5-S6           |
| Table S2            | Specific Capacitance values of <i>MNC-H<sub>2</sub>Q</i> at different current densities and temperatures | S6              |

## Powder X-Ray Diffraction (PXRD) Results of *MNC* and *MNC-H<sub>2</sub>O*

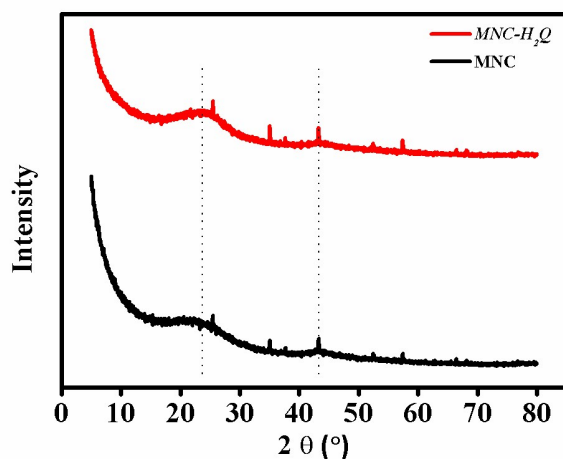

**Figure S1:** PXRD patterns of *MNC* and *MNC-H<sub>2</sub>O*. Spikes in the spectra were presumably due to slight metal impurity in the *MNC*.

## Brunauer-Emmett-Teller (BET) Analysis of *MNC*

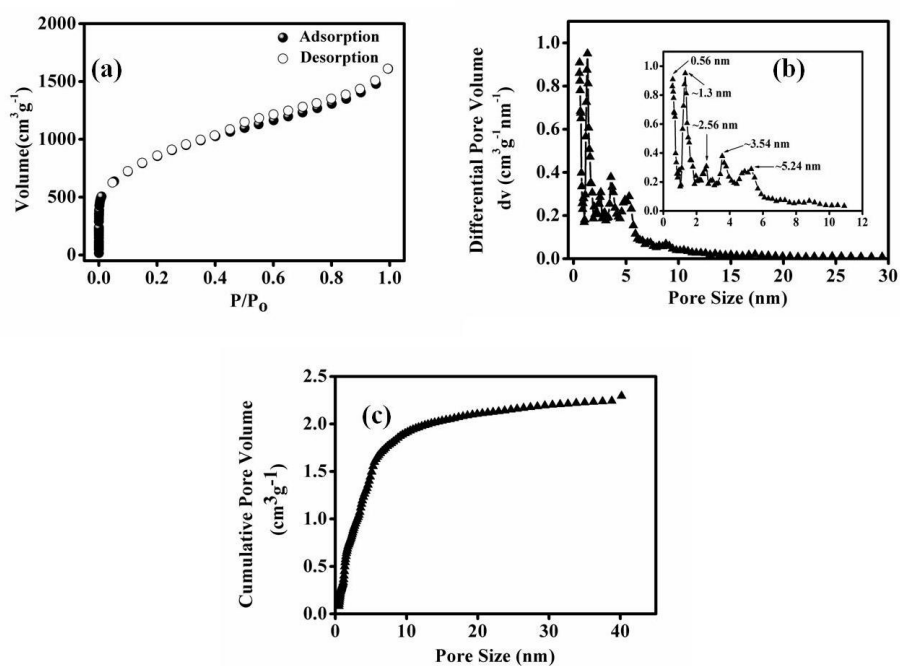

**Figure S2:** Characterizations of *MNC* using BET. (a)  $N_2$  adsorption/desorption isotherms, (b) Pore size distribution and (c) Cumulative pore volume.

**Thermogravimetric Analysis (TGA) curve of  $MNC-H_2Q$**

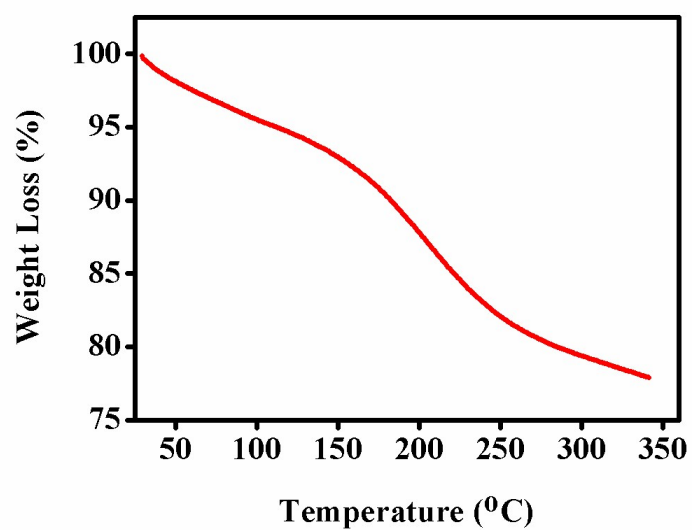

**Figure S3:** TGA curve of  $MNC-H_2Q$ .

**Differential scanning calorimetry (DSC) curve of  $MNC-H_2Q$**

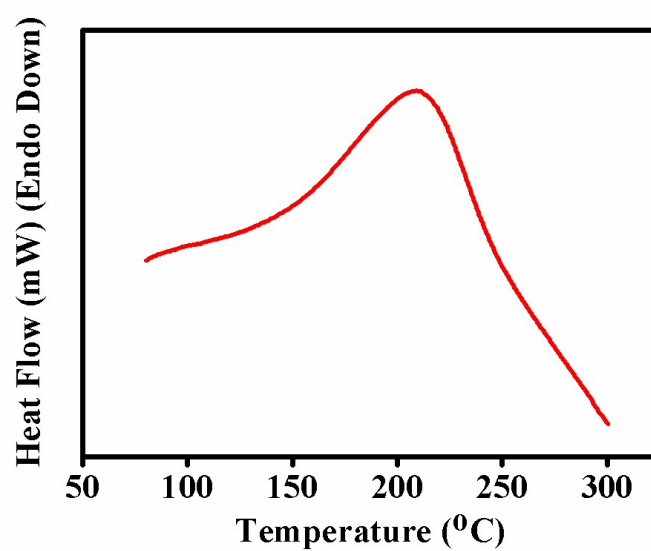

**Figure S4:** DSC curve of  $MNC-H_2Q$ .

**Cyclic voltammetry (CV) overlays of  $MNC$ ,  $H_2Q$  and  $MNC-H_2Q$  in three electrodes system**

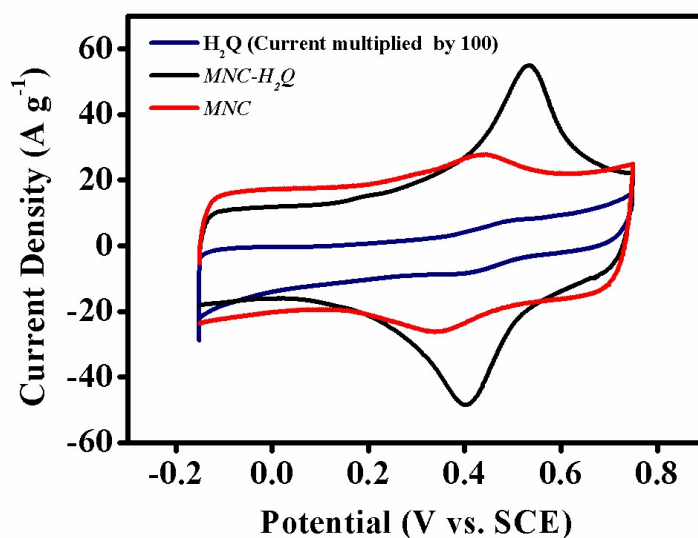

**Figure S5:** Overlay of CVs of  $MNC$ ,  $H_2Q$  and  $MNC-H_2Q$  at  $100 \text{ mV s}^{-1}$ . Current for  $H_2Q$  has been multiplied by 100 for better visibility.

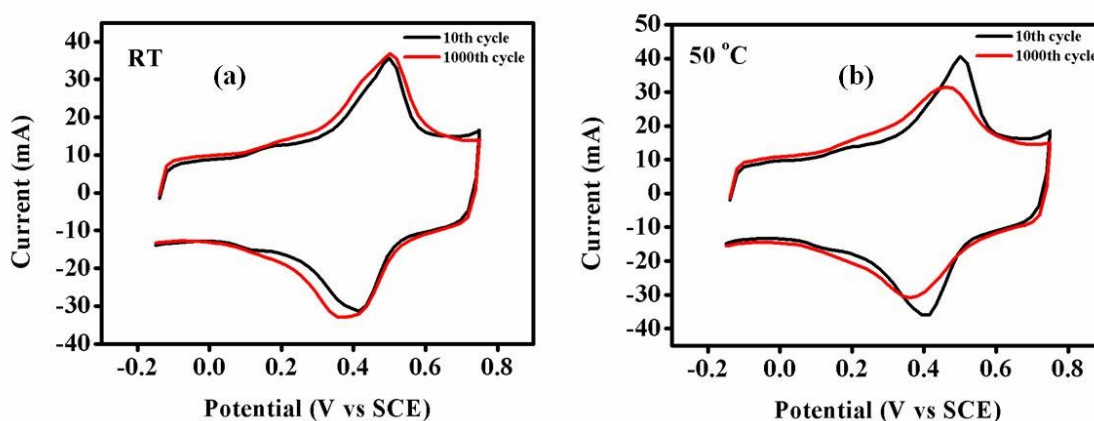

**Figure S6.** CV overlays of  $MNC-H_2Q$  during cyclic tests of the 10<sup>th</sup> and 1000<sup>th</sup> cycles at (a)  $20^\circ\text{C}$  and at (b)  $50^\circ\text{C}$ . (Scan rate  $100 \text{ mV s}^{-1}$ ).

**Table S1:** Specific Capacitances of *MNC* at different scan rates.

| Scan Rate (mV s <sup>-1</sup> ) | Specific Capacitance (F g <sup>-1</sup> ) |
|---------------------------------|-------------------------------------------|
| 100                             | 199                                       |
| 50                              | 206                                       |
| 20                              | 214                                       |
| 10                              | 220                                       |
| 5                               | 226                                       |
| 1                               | 248                                       |

**Cyclic voltammetry (CV) overlays of *MNC*-H<sub>2</sub>O in three electrodes system at different temperatures**

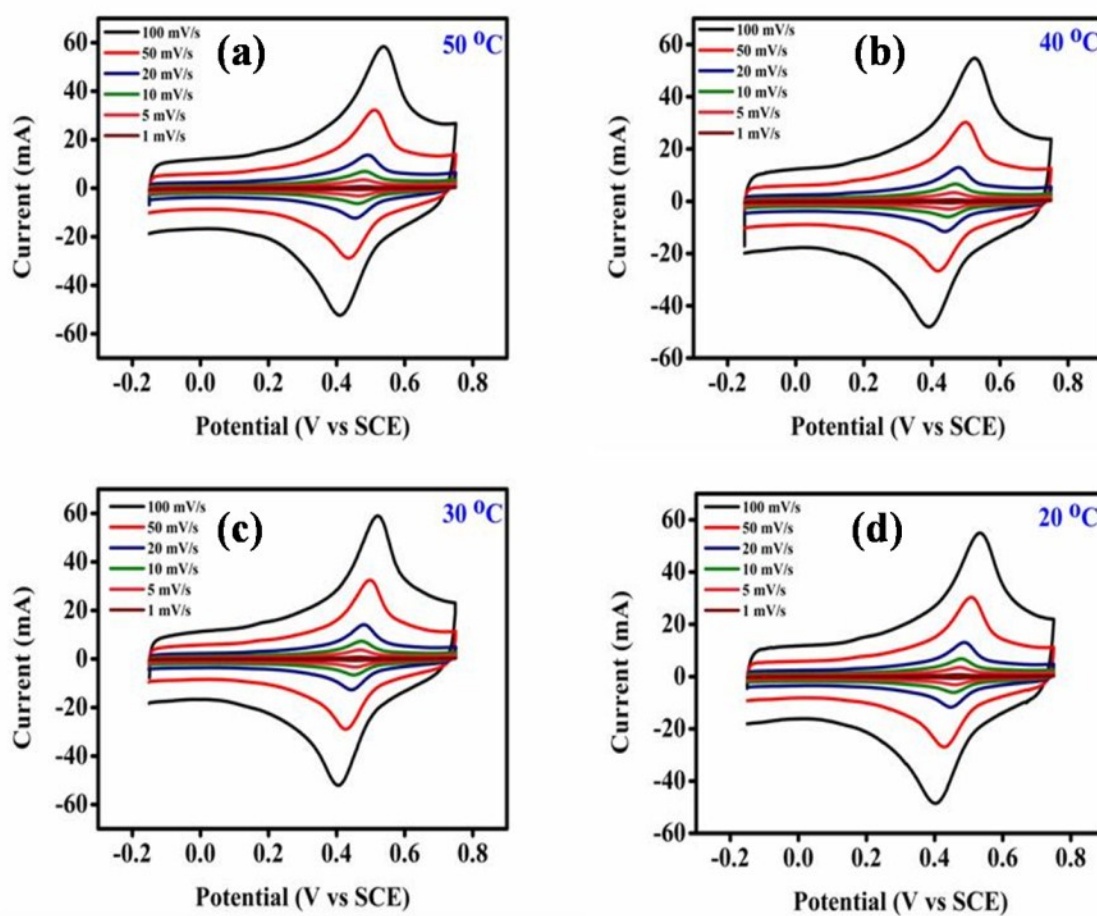

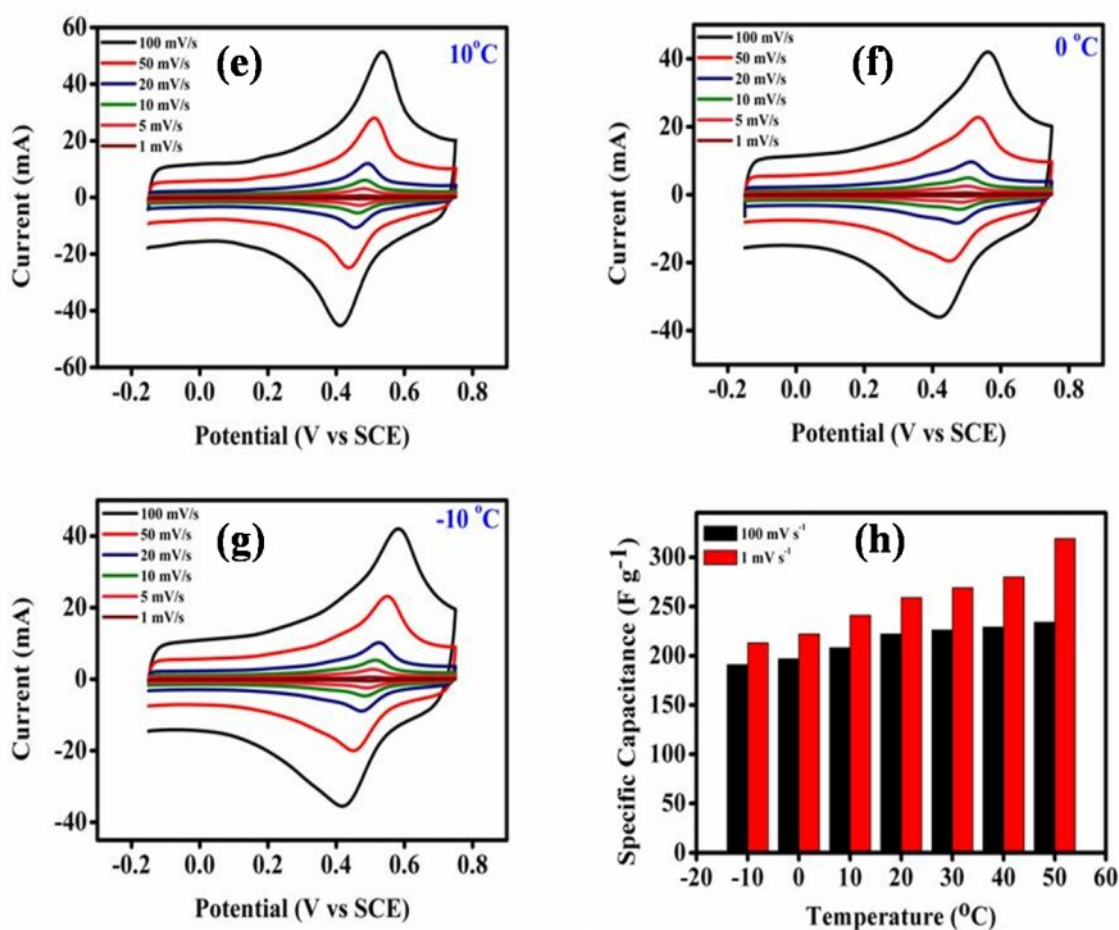

**Figure S7 :** CVs of  $MNC-H_2Q$  at (a) 50, (b) 40, (c) 30, (d) 20, (e) 10, (f) 0, and (g) -10 °C. (h). Variation of specific capacitance values at different temperatures at 100 and 1  $mV s^{-1}$ .

**Table S2:** Specific Capacitances of  $MNC-H_2Q$  at different current densities and temperatures

|                               |     | Specific Capacitance ( $F g^{-1}$ ) |      |       |       |       |       |       |
|-------------------------------|-----|-------------------------------------|------|-------|-------|-------|-------|-------|
| Current Density ( $Ag^{-1}$ ) |     | -10 °C                              | 0 °C | 10 °C | 20 °C | 30 °C | 40 °C | 50 °C |
|                               | 10  | 192                                 | 195  | 197   | 218   | 220   | 226   | 229   |
|                               | 5   | 195                                 | 198  | 200   | 226   | 230   | 233   | 237   |
|                               | 2   | 202                                 | 206  | 212   | 234   | 241   | 248   | 254   |
|                               | 1.5 | 204                                 | 212  | 215   | 238   | 248   | 260   | 264   |
|                               | 1   | 205                                 | 220  | 235   | 256   | 265   | 275   | 295   |
